# Supplementary material
Source: Springer Nature journal article supplement (https://www.springermedizin.de/resource/supplementary/12955_2004_168_MOESM3_ESM.pdf/9559812)

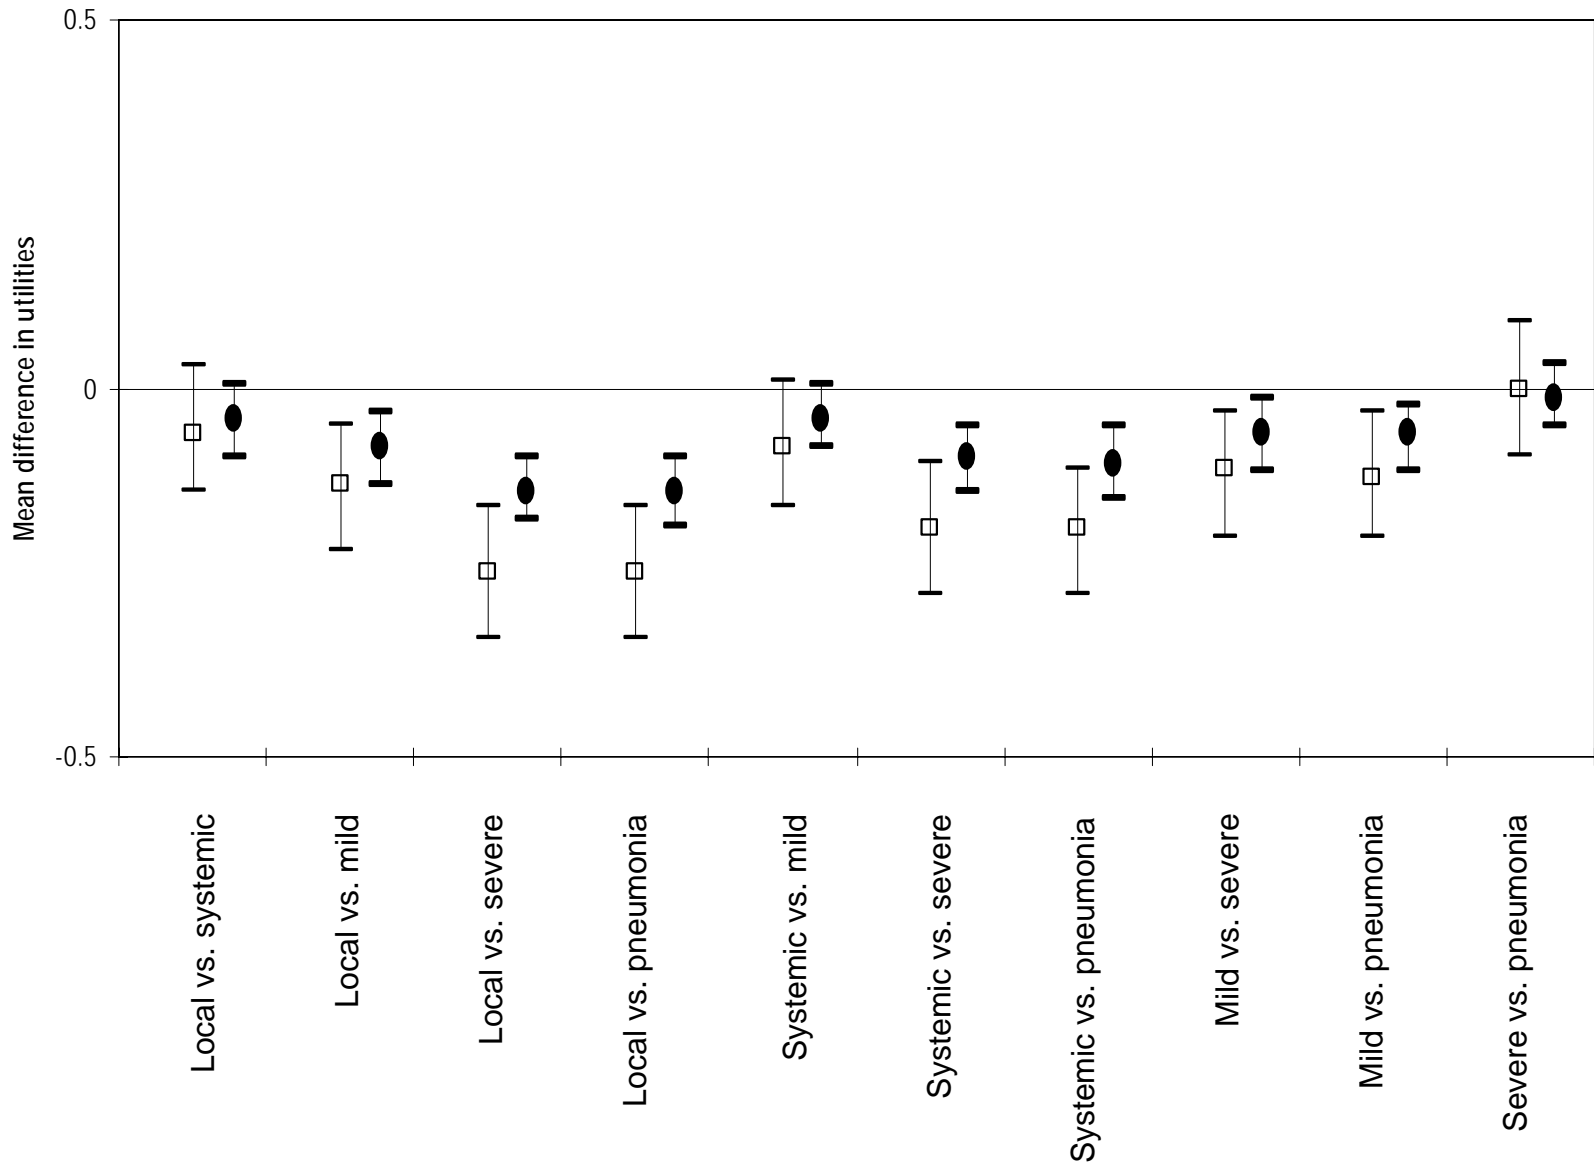

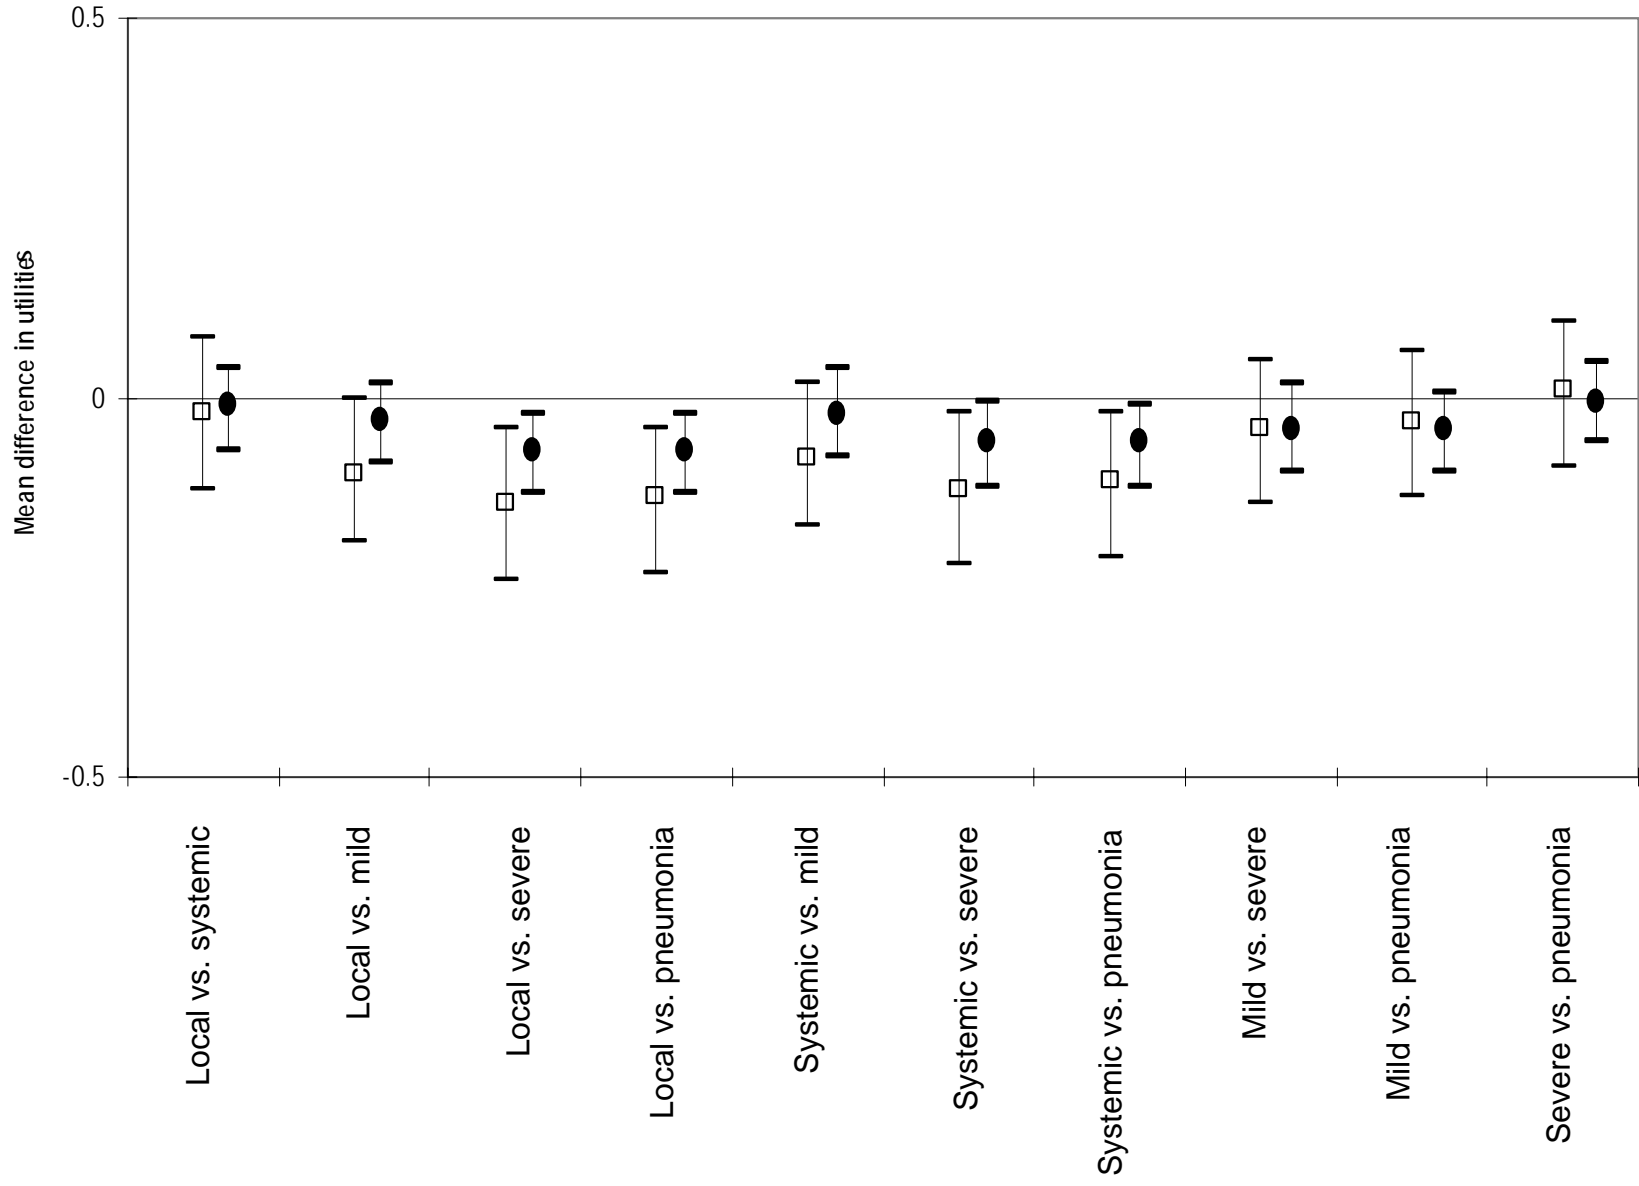

Supplement: MOESM3 [file 9559812]
